# Supplementary material for: Structural and dynamic evolution of the amphipathic N-terminus diversifies enzyme thermostability in the glycoside hydrolase family 12
Source: Royal Society of Chemistry journal article supplement (doi:10.1039/c6cp02998a), 2016-01-01
Supplement: c6cp02998a1.pdf [file c6cp02998a1.pdf]

## Supplemental Information

### **Structural and Dynamic Evolution of the Amphipathic N-terminus Diversify Enzyme Thermostability in the Glycoside Hydrolase Family 12**

Xukai Jiang,<sup>a</sup> Guanjun Chen,<sup>a</sup> and Lushan Wang<sup>\*a,b</sup>

<sup>a</sup>State Key Laboratory of Microbial Technology, Shandong University, Jinan 250100, China.

<sup>b</sup>State Key Laboratory of Biochemical Engineering, Institute of Process Engineering, Chinese Academy of Sciences, Beijing, 10090, China

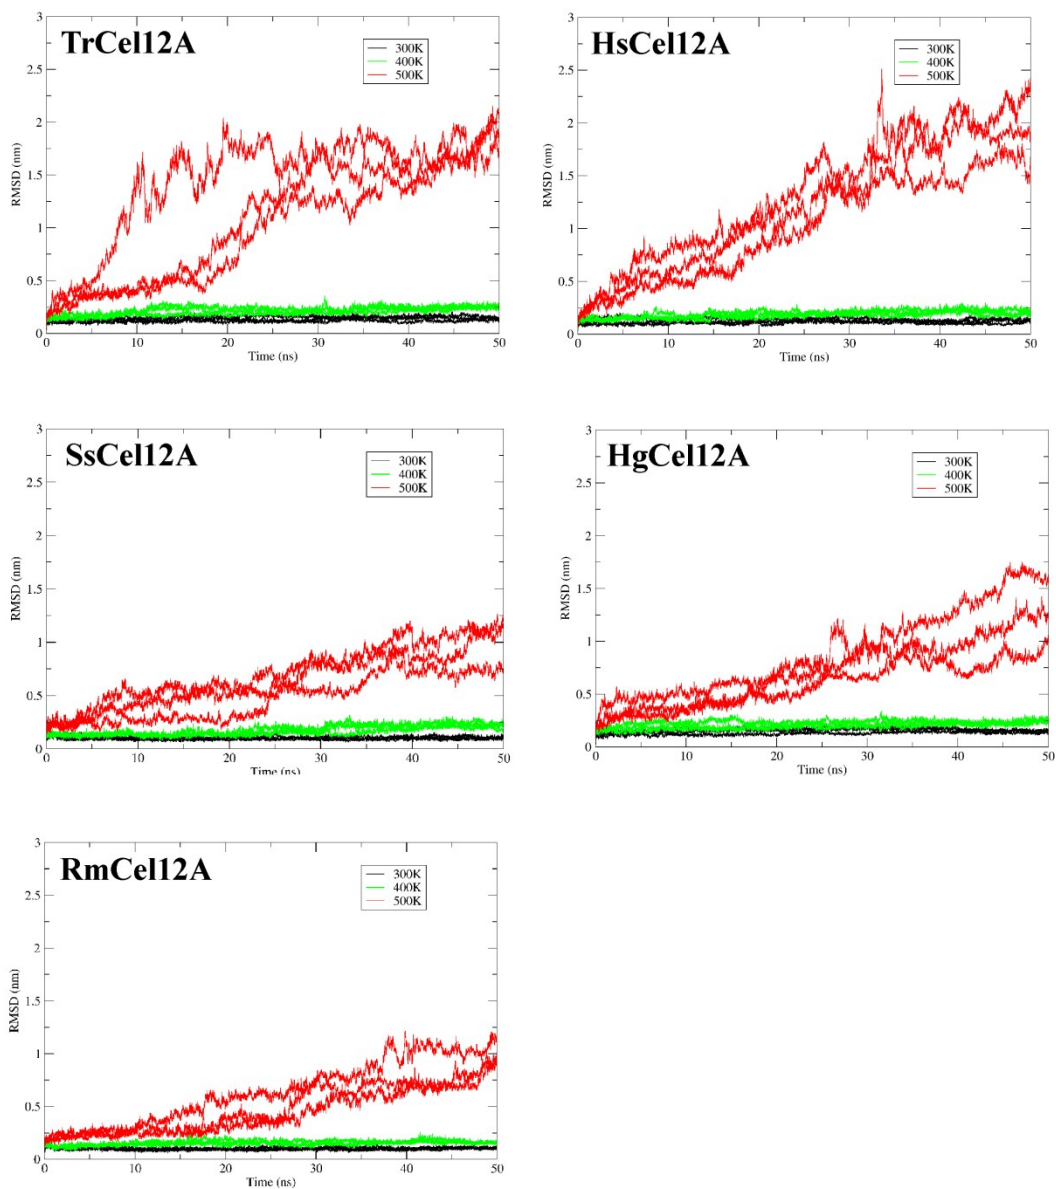

**Figure S1.** Time evolution of the backbone RMSD for GH12 *enzymes*. The calculated data obtained from the simulations at 300, 400, and 500K with three replicas are shown in *black*, *green* and *red*, respectively.

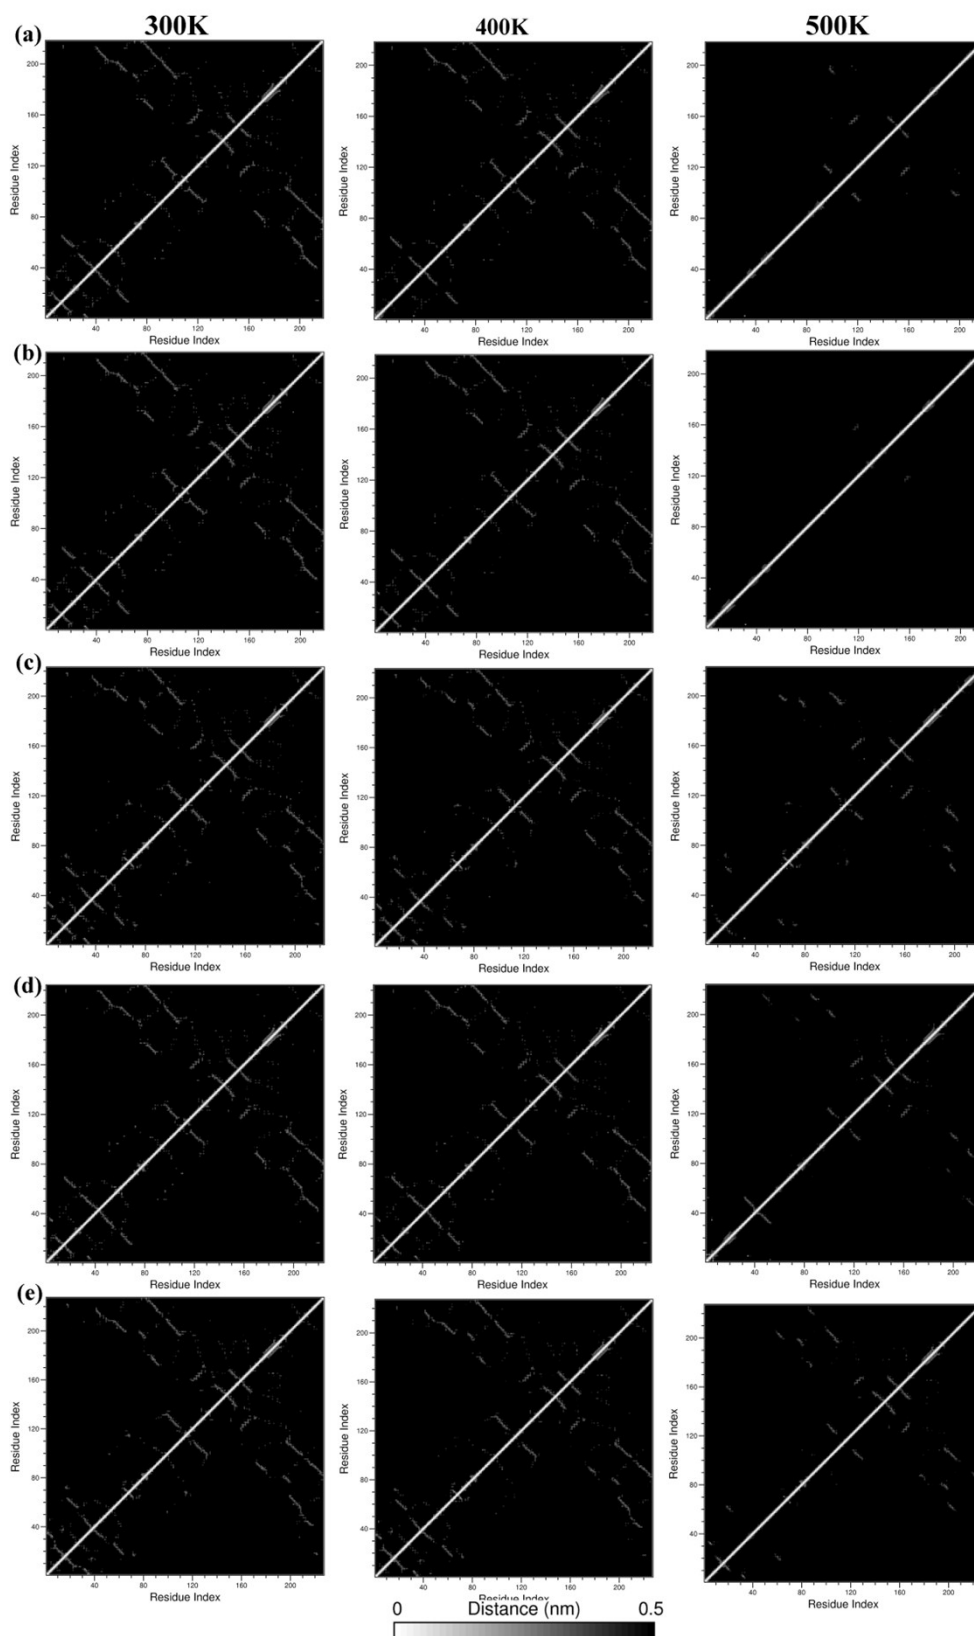

**Figure S2.** The smallest distance matrices between residue pairs at 300, 400 and 500 K. A contact is defined if the distance is less than 0.5 nm. (a-e) indicate TrCel12A, HsCel12A, SsCel12A, HgCel12A and RmCel12A.

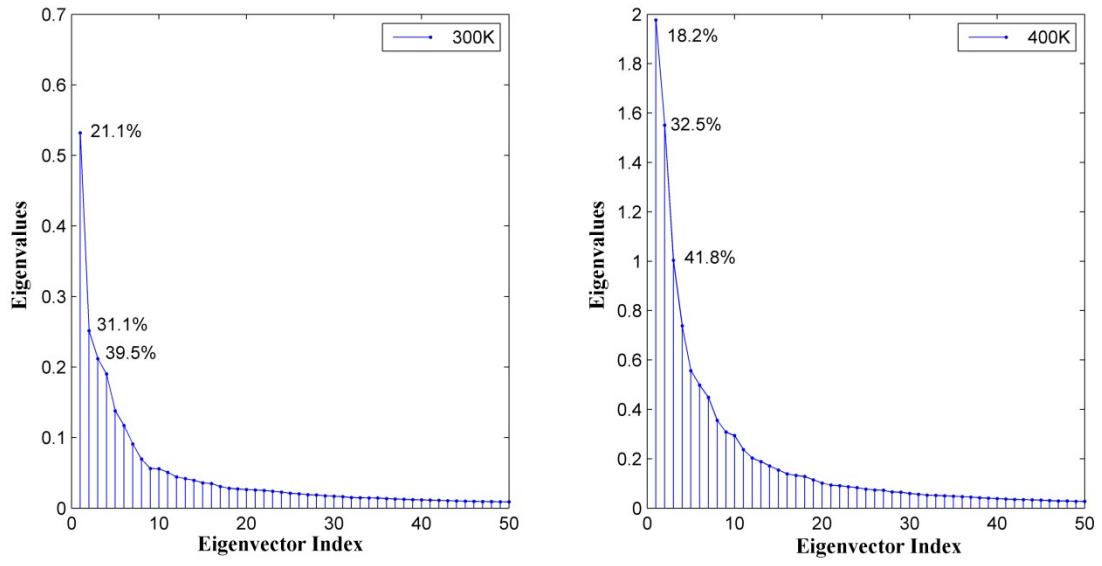

**Figure S3.** The eigenvalues against its eigenvector index. The proportion of variance of the first three eigenvectors were labeled.

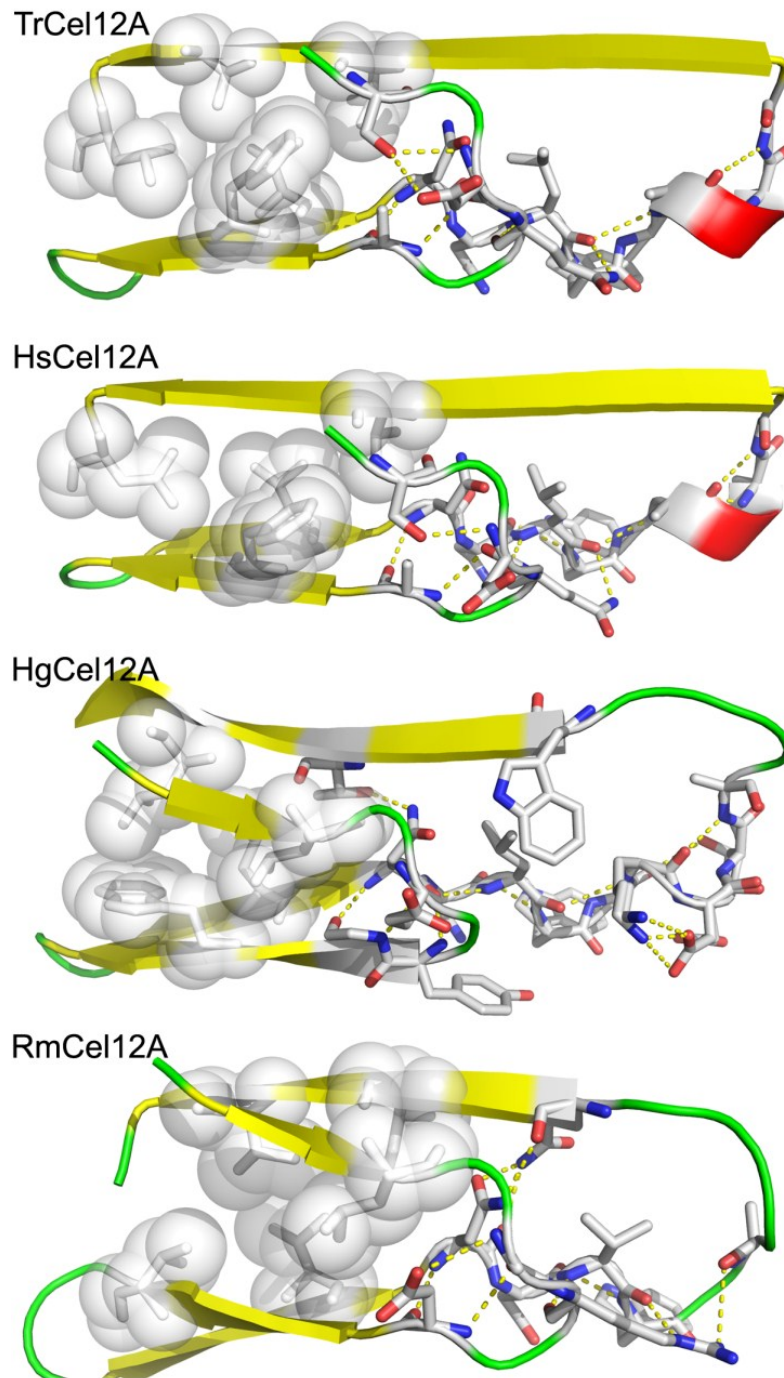

**Figure S4.** The amphipathic pattern of internal interactions within the N-terminus. The residues that participate in hydrophobic packing core and the hydrogen bonding network were shown in sphere and lines models, respectively.
